# Supplementary material for: Phytochemical content, especially spermidine derivatives, presenting antioxidant and antilipoxygenase activities in Thai bee pollens
Source: PeerJ. 2022 May 25;10:e13506. doi: 10.7717/peerj.13506 (PMC9147323; doi:10.7717/peerj.13506)
Supplement: Supplemental Information 1 [file peerj-10-13506-s001.xlsx]

## Sheet: Sheet1
Supplement 1.
Sample	Weight (g)	Yield (%)	Character
Partitioned extracts:
MTCBP	64.93	46.38	Pale brown oil
DCMCBP	7.41	5.29	Sticky dark brown solid
HXCBP	7.73	5.52	Dark brown oil
MTHBP	79.97	57.12	Dark brown oil
DCMHBP	12.55	8.96	Sticky dark brown solid
HXHBP	8.98	6.41	Dark brown oil
MTMBP	57.9	41.36	Dark brown oil
DCMMBP	9.89	7.06	Sticky dark brown solid
HXMBP	7.43	5.31	Dark brown oil
MTNBP	79.49	56.8	Pale brown oil
DCMNBP	4.68	3.34	Sticky brown solid
HXNBP	5.31	3.79	Pale brown oil
MTXBP	96.81	69.15	Dark brown oil
DCMXBP	8.04	56.8	Sticky dark brown solid
HXXBP	11.7	8.36	Dark brown oil
MTABP	79.28	56.63	Dark brown oil
DCMABP	5.75	4.11	Sticky dark brown solid
HXABP	8.47	6.05	Dark brown oil
After SiG60-CC:
DCMMBP1	210	3.72	Sticky brown solid
DCMMBP2	300	5.32	Sticky brown solid
DCMMBP3	2060	36.52	Sticky pale yellow solid
DCMMBP4	410	7.27	Sticky brown solid
DCMMBP5	2380	42.2	Sticky dark brown solid
After HPLC:
DCMMBP3-1	4.1	20.5	White solid
DCMMBP3-2	7.9	39.5	Pale yellow solid
