# Supplementary material for: Phytochemical content, especially spermidine derivatives, presenting antioxidant and antilipoxygenase activities in Thai bee pollens
Source: PeerJ. 2022 May 25;10:e13506. doi: 10.7717/peerj.13506 (PMC9147323; doi:10.7717/peerj.13506)
Supplement: Supplemental Information 5 [file peerj-10-13506-s005.xlsx]

## Sheet: Sheet1
Supplement 5
Mass fragment	Compound 1	Compound 2
[M+Na]+	696.689	696.759
[M+H]+	674.706	674.695
[M+Na-177]+	522.817	522.76
